# Supplementary material for: Transcriptome-Wide Characterization of piRNAs during the Developmental Process of European Honey-Bee Larval Guts
Source: MDPI journal article supplement (doi:10.3390/genes13101879), 2022-10-17
Supplement: s1 [file s1]

**Table S2.** Detailed information about the identified DEpiRNAs in *A. mellifera* larval guts.

| Gene ID         | log2_FC      | Pvalue      | Classify    |
|-----------------|--------------|-------------|-------------|
| piR-ame-1009988 | 14.52139821  | 7.22E-05    | Am4 vs. Am5 |
| piR-ame-1028819 | 1.034668215  | 0.024017822 |             |
| piR-ame-1075475 | -1.19554946  | 0.006042626 |             |
| piR-ame-1077365 | -1.649490421 | 0.00074854  |             |
| piR-ame-1146559 | -1.039234323 | 0.00384788  |             |
| piR-ame-1146560 | -1.346401603 | 0.006373339 |             |
| piR-ame-1150261 | 2.43097329   | 0.000539812 |             |
| piR-ame-1176116 | -1.293388999 | 0.019680137 |             |
| piR-ame-1183555 | 2.738821322  | 0.005660361 |             |
| piR-ame-1184482 | 1.136360028  | 0.039990625 |             |
| piR-ame-1186994 | -1.658142914 | 0.040683334 |             |
| piR-ame-1192181 | -1.284486198 | 0.026096215 |             |
| piR-ame-1219967 | -1.240260699 | 0.01507866  |             |
| piR-ame-1223398 | -11.37535082 | 3.19E-09    |             |
| piR-ame-1233036 | 1.778667466  | 0.014847528 |             |
| piR-ame-1241456 | -1.31278976  | 0.011073679 |             |
| piR-ame-1242256 | 1.079919925  | 0.023886915 |             |
| piR-ame-14055   | 14.52139821  | 7.22E-05    |             |
| piR-ame-14476   | 1.704554003  | 0.03793934  |             |
| piR-ame-145057  | 10.84556062  | 5.36E-08    |             |
| piR-ame-15258   | 1.81125685   | 0.032806637 |             |
| piR-ame-180189  | 2.437074481  | 0.000523596 |             |
| piR-ame-18387   | 3.704133929  | 0.030395754 |             |
| piR-ame-208022  | 3.704133929  | 0.030395754 |             |
| piR-ame-225379  | -1.094921951 | 0.000269889 |             |
| piR-ame-237656  | 14.46023574  | 6.41E-05    |             |
| piR-ame-237658  | 3.685559249  | 0.02994433  |             |
| piR-ame-241618  | 1.573505518  | 0.015856361 |             |
| piR-ame-247619  | 2.009937572  | 0.00170725  |             |
| piR-ame-251803  | 12.09607601  | 0.000118641 |             |
| piR-ame-259611  | 1.023838421  | 0.023776365 |             |
| piR-ame-269855  | 3.731555176  | 0.031064073 |             |
| piR-ame-31793   | 14.4850127   | 6.73E-05    |             |
| piR-ame-320912  | 14.4850127   | 6.73E-05    |             |
| piR-ame-325111  | 1.250998634  | 0.015785532 |             |
| piR-ame-378755  | 2.866528181  | 0.003350951 |             |
| piR-ame-387266  | -1.228917519 | 0.009897205 |             |
| piR-ame-387267  | -1.069617382 | 0.004554813 |             |
| piR-ame-39500   | 1.81125685   | 0.032806637 |             |
| piR-ame-39501   | 1.81125685   | 0.032806637 |             |
| piR-ame-414850  | 3.731555176  | 0.031064073 |             |

|                 |                  |             |             |
|-----------------|------------------|-------------|-------------|
| piR-ame-456655  | 14.52139821      | 7.22E-05    |             |
| piR-ame-471152  | 1.23395953       | 0.043693073 |             |
| piR-ame-47855   | 3.685559249      | 0.02994433  |             |
| piR-ame-5       | 14.52139821      | 7.22E-05    |             |
| piR-ame-500944  | 2.847408657      | 0.002291196 |             |
| piR-ame-502767  | 11.64686918      | 3.39E-05    |             |
| piR-ame-504668  | 2.769193153      | 0.013820964 |             |
| piR-ame-506264  | 11.45955116      | 1.54E-05    |             |
| piR-ame-521089  | 2.47564098       | 0.000602643 |             |
| piR-ame-605224  | 2.443142079      | 0.000529945 |             |
| piR-ame-612850  | 2.441380028      | 0.000530794 |             |
| piR-ame-633772  | -1.03605132      | 0.003829105 |             |
| piR-ame-638412  | 2.034105921      | 0.012767334 |             |
| piR-ame-641984  | 2.425762878      | 0.00056452  |             |
| piR-ame-665593  | 1.601829912      | 0.037890966 |             |
| piR-ame-670896  | 3.695411797      | 0.007655153 |             |
| piR-ame-670897  | 3.075365087      | 0.017428252 |             |
| piR-ame-70388   | 2.895840386      | 0.003734866 |             |
| piR-ame-718308  | 3.35935963       | 0.002756793 |             |
| piR-ame-742536  | 11.33688401      | 5.42E-07    |             |
| piR-ame-748816  | 1.110466873      | 0.035827816 |             |
| piR-ame-750627  | 2.199810264      | 0.002553317 |             |
| piR-ame-784272  | 1.488182863      | 0.005844392 |             |
| piR-ame-850115  | 2.722232777      | 0.015722835 |             |
| piR-ame-852767  | 11.64686918      | 3.39E-05    |             |
| piR-ame-856650  | -1.493954935     | 0.000289637 |             |
| piR-ame-904144  | 2.721687573      | 0.007156561 |             |
| piR-ame-918866  | 1.749304739      | 0.04146075  |             |
| piR-ame-928134  | 3.498401823      | 0.001100457 |             |
| piR-ame-930873  | -1.009393368     | 0.042679462 |             |
| piR-ame-934193  | 2.009937572      | 0.00170725  |             |
| piR-ame-941843  | 2.189862052      | 0.009777397 |             |
| piR-ame-945352  | 11.43946558      | 4.77E-06    |             |
| piR-ame-974219  | 2.432755806      | 0.000538972 |             |
| piR-ame-978292  | 3.704133929      | 0.030395754 |             |
| piR-ame-990954  | 11.81263727      | 5.82E-05    |             |
| piR-ame-1173337 | -10.963170640576 | 1.34E-05    |             |
| piR-ame-1243913 | 3.009718729      | 0.018774132 |             |
| piR-ame-1246710 | -1.184855605     | 0.044872939 |             |
| piR-ame-260979  | -11.19715525     | 3.78E-05    | Am5 vs. Am6 |
| piR-ame-31653   | -10.96317064     | 1.34E-05    |             |
| piR-ame-358367  | -11.19715525     | 3.78E-05    |             |
| piR-ame-592661  | 1.13853464       | 0.005496965 |             |
